# Supplementary material
Source: Royal Society of Chemistry journal article supplement (doi:10.1039/d6se00252h)
Supplement: d6se00252h1.pdf [file d6se00252h1.pdf]

## Supplementary material

### Green Energy Storage: Upcycling of Lithium-ion Battery for its Utilization in a High-Performance Asymmetric Supercapacitor Device

Umang Singh,<sup>a</sup> Ritika Sharma,<sup>b</sup> Dilbag Singh,<sup>a\*</sup> Deepak Pant<sup>a\*</sup>

<sup>a</sup> School of Earth and Environmental Sciences, Central University of Himachal Pradesh, Dharamshala, Kangra, Himachal Pradesh-176215

<sup>b</sup> University Research Department, Rayat Bahra University, Mohali, 140103, Punjab, India

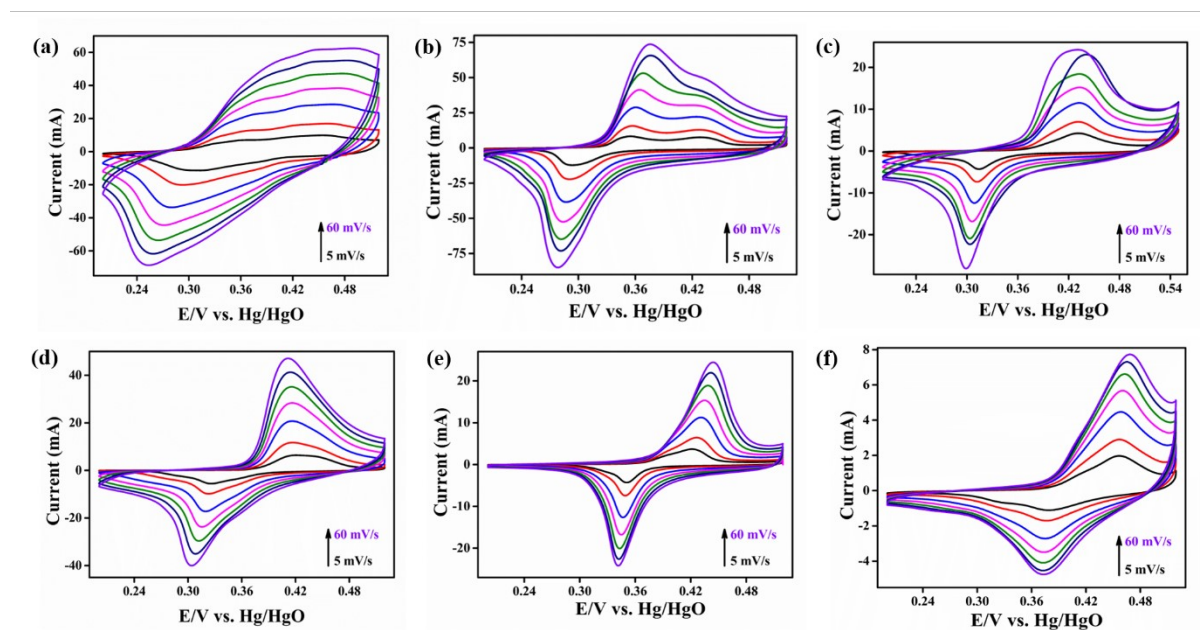

**Figure S1** CV at increasing scan rate of (a) LCO-BS\_NF; (b) LCO-S\_NF; (c) LCO-C\_NF; (d) GR-C\_NF; (e) GR-S\_NF; (f) GR-BS\_NF

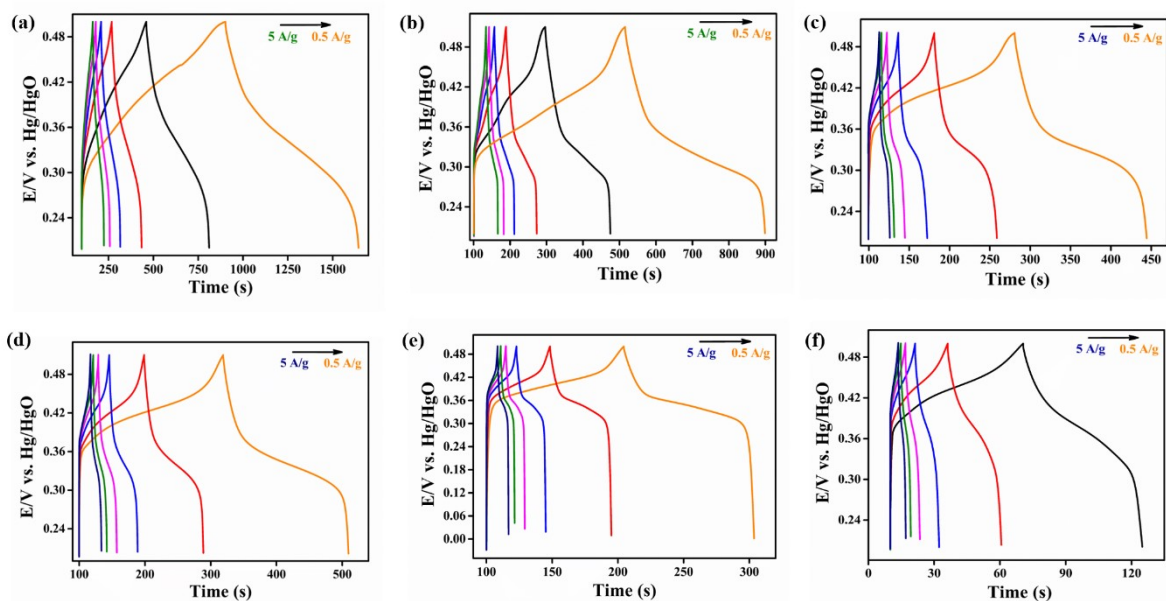

**Figure S2** GCD at increasing current density of (a) LCO-BS\_NF; (b) LCO-S\_NF; (c) LCO-C\_NF; (d) GR-C\_NF; (e) GR-S\_NF; (f) GR-BS\_NF

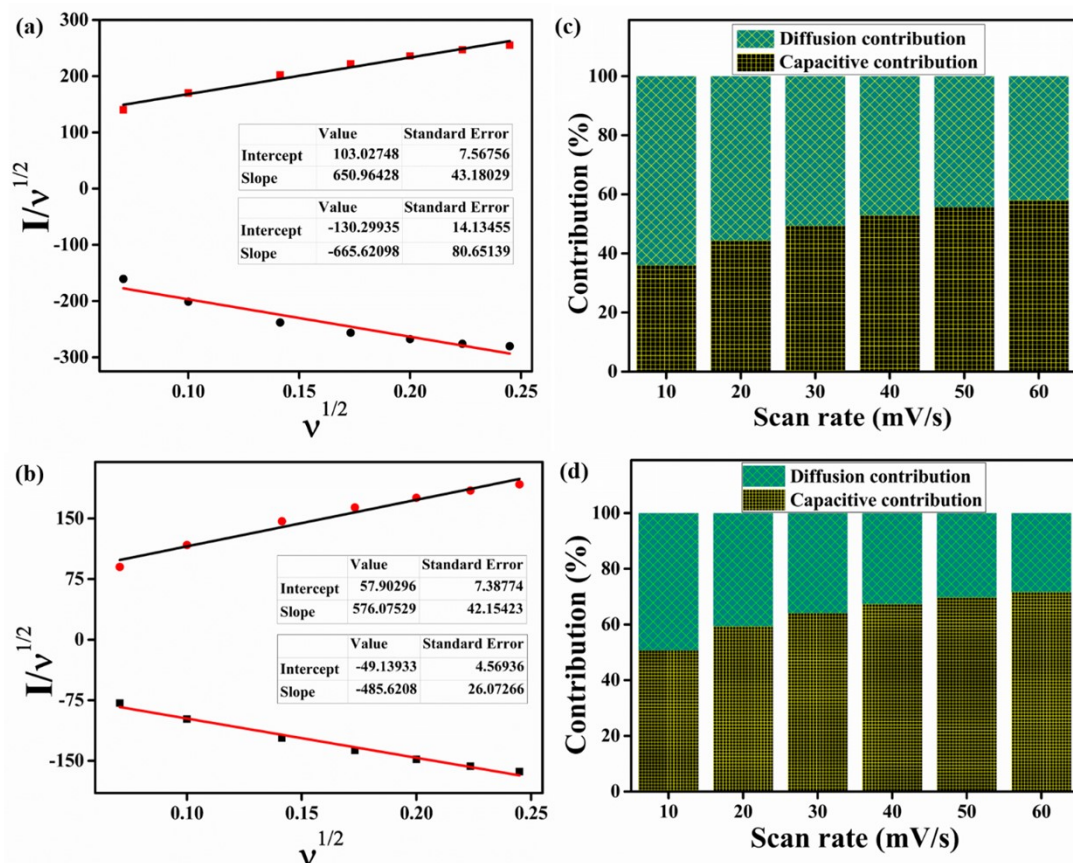

**Figure S3**  $I/v^{1/2}$  versus  $v^{1/2}$  plot for oxidation and reduction current peak of (a) LCO-BS\_NF and (b) GR-C\_NF, and relative capacitive and diffusion contribution graphs of (c) LCO-BS\_NF and (d) GR-C\_NF.

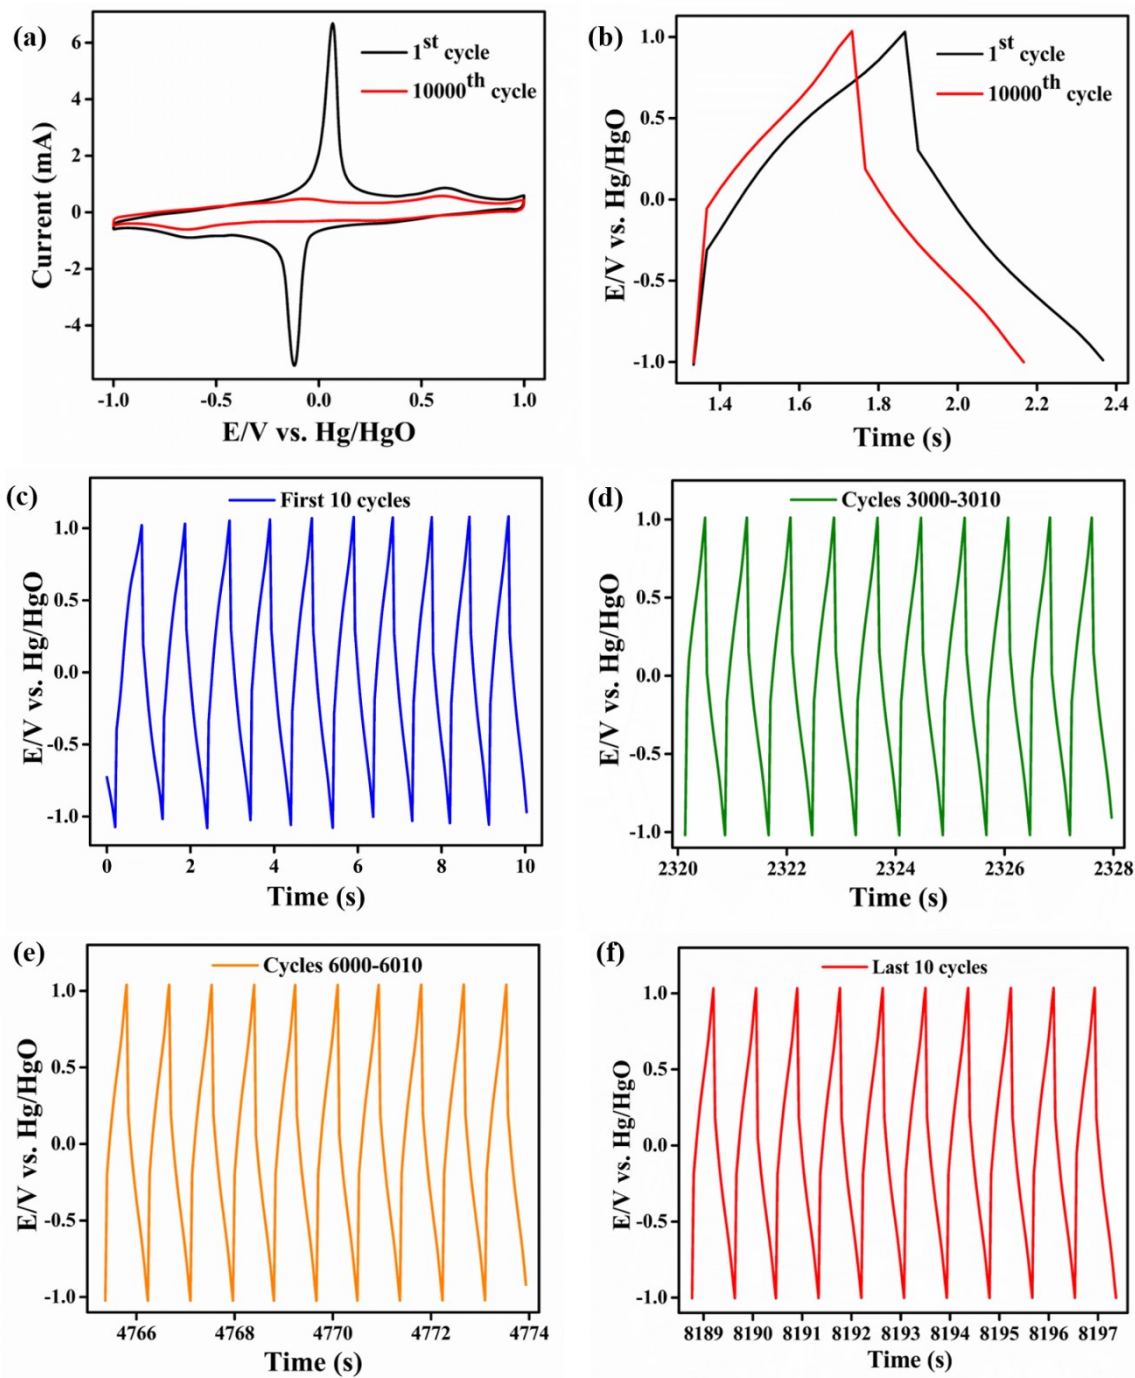

**Figure S4** (a) Comparison of CV curve before and after cyclic stability; (b) GCD curve of the first cycle and the last cycle after cyclic stability; (c) first ten cycles of cyclic stability; (d),(e) intermediate cycles of cyclic stability, and (f) last ten cycles of cyclic stability

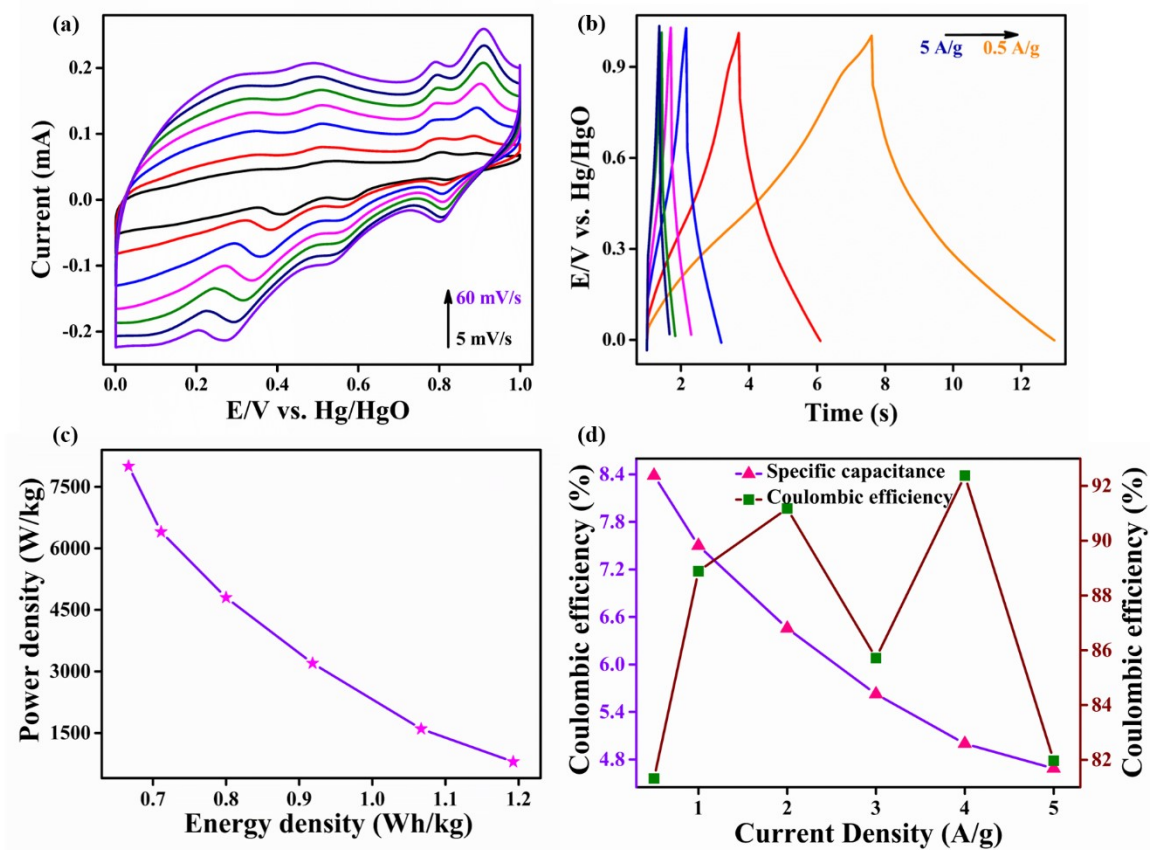

**Figure S5** Symmetric device of LCO-BS\_NF (a) CV at increasing scan rate; (b) GCD at increasing current density; (c) power density vs energy density curve and (d) graph showing specific capacitance and coulombic efficiency at various current densities

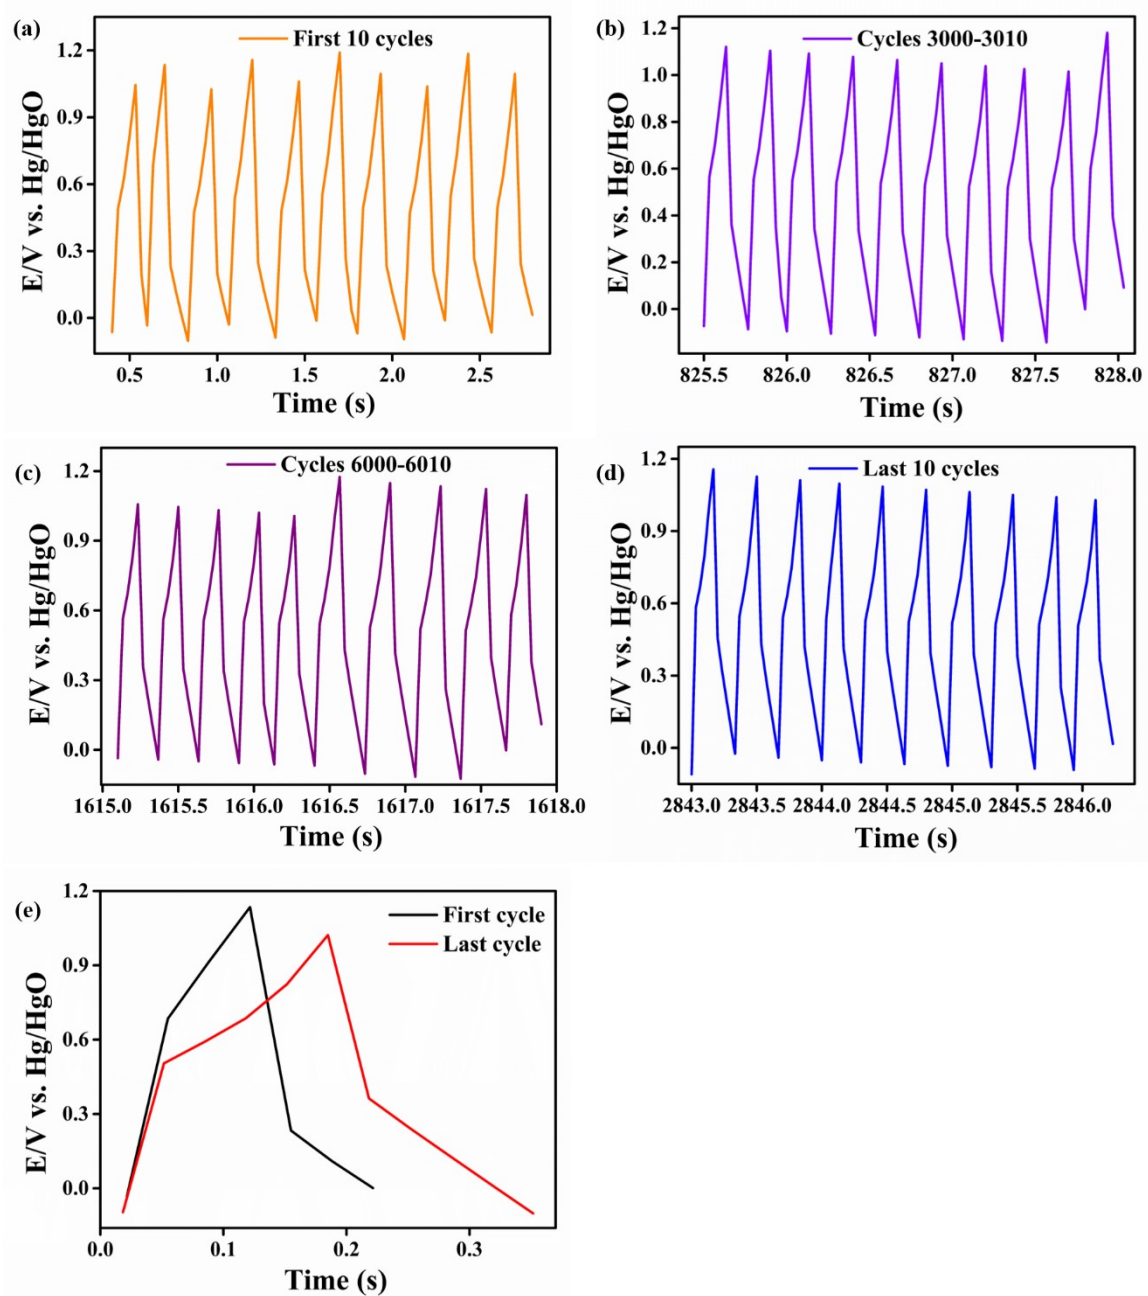

**Figure S6** Symmetric device of LCO-BS\_NF (a) first ten cycles of cyclic stability; (b),(c) intermediate cycles of cyclic stability; (d) last ten cycles of cyclic stability and (e) GCD curve of the first cycle and the last cycle after cyclic stability

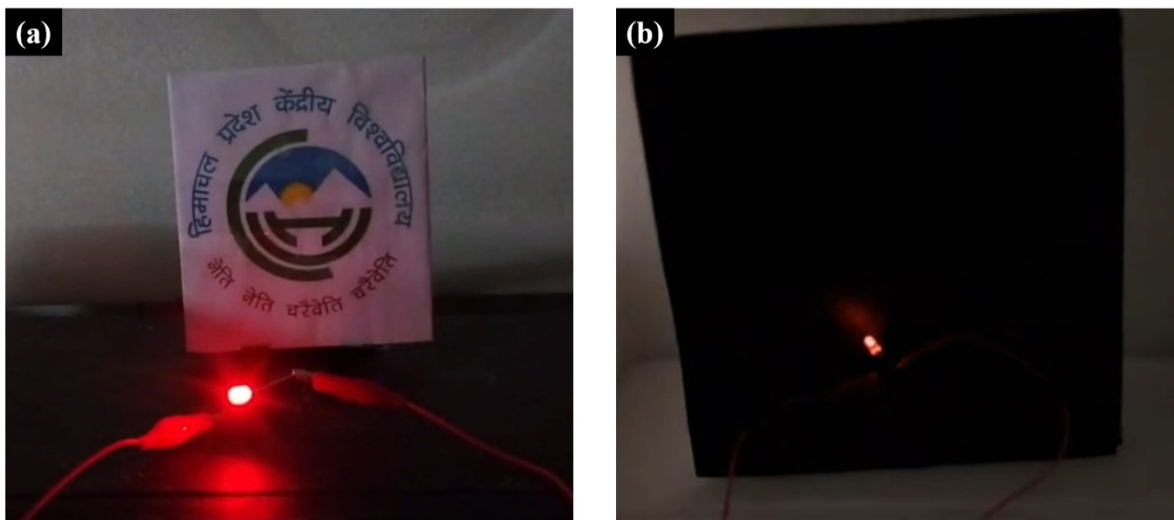

**Figure S7** Illumination of red LED bulb by (a) symmetric LCO-BS\_NF device and (b) asymmetric LCO-BS\_NF and GR-C\_NF device

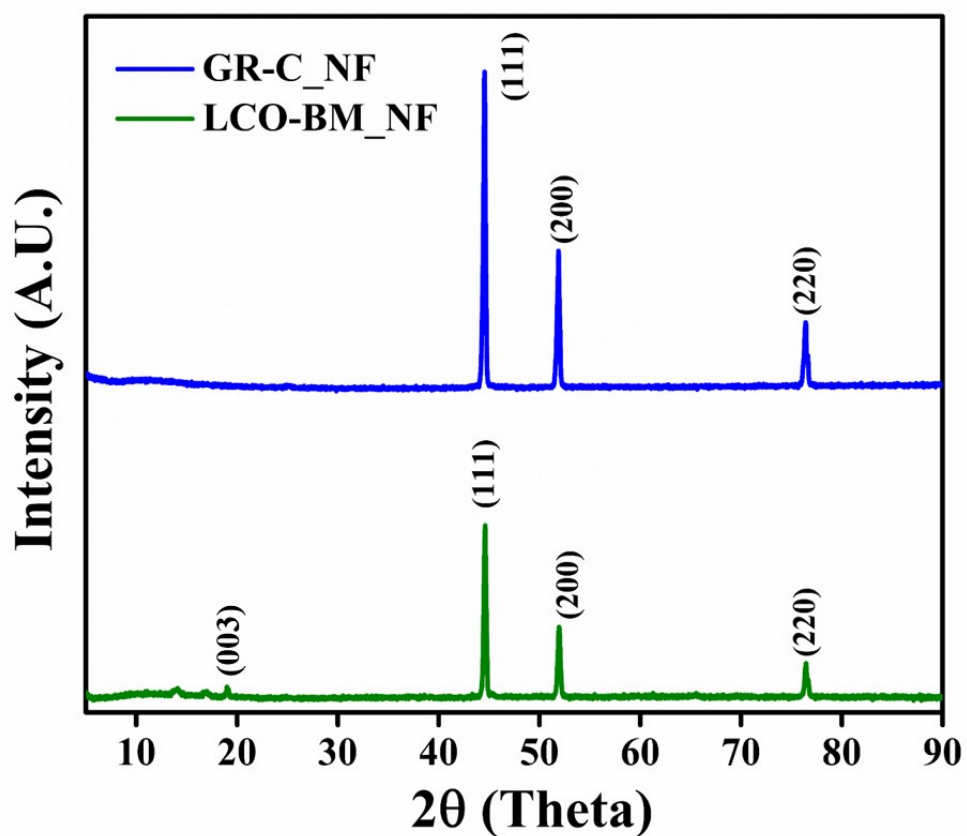

**Figure S8** XRD diffractograms of GR-C\_NF and LCO-BM\_NF

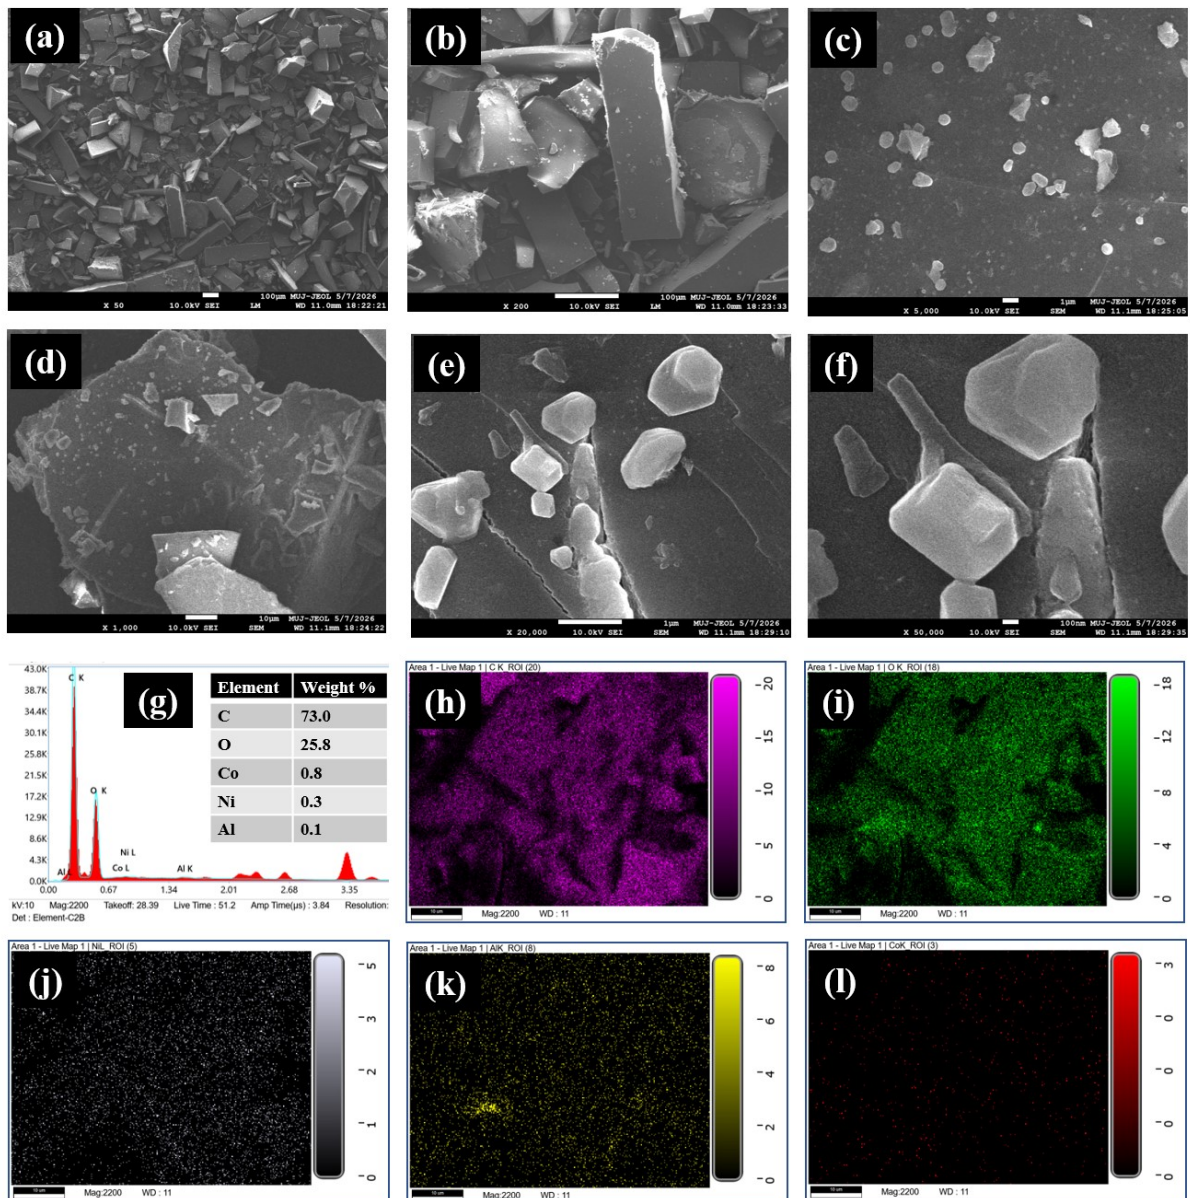

**Figure S9** SEM characterization of LCO-C (a-f) SEM micrographs at different magnifications; (g) EDX spectrum and (h-l) elemental mapping of C, O, Ni, Al and Co respectively

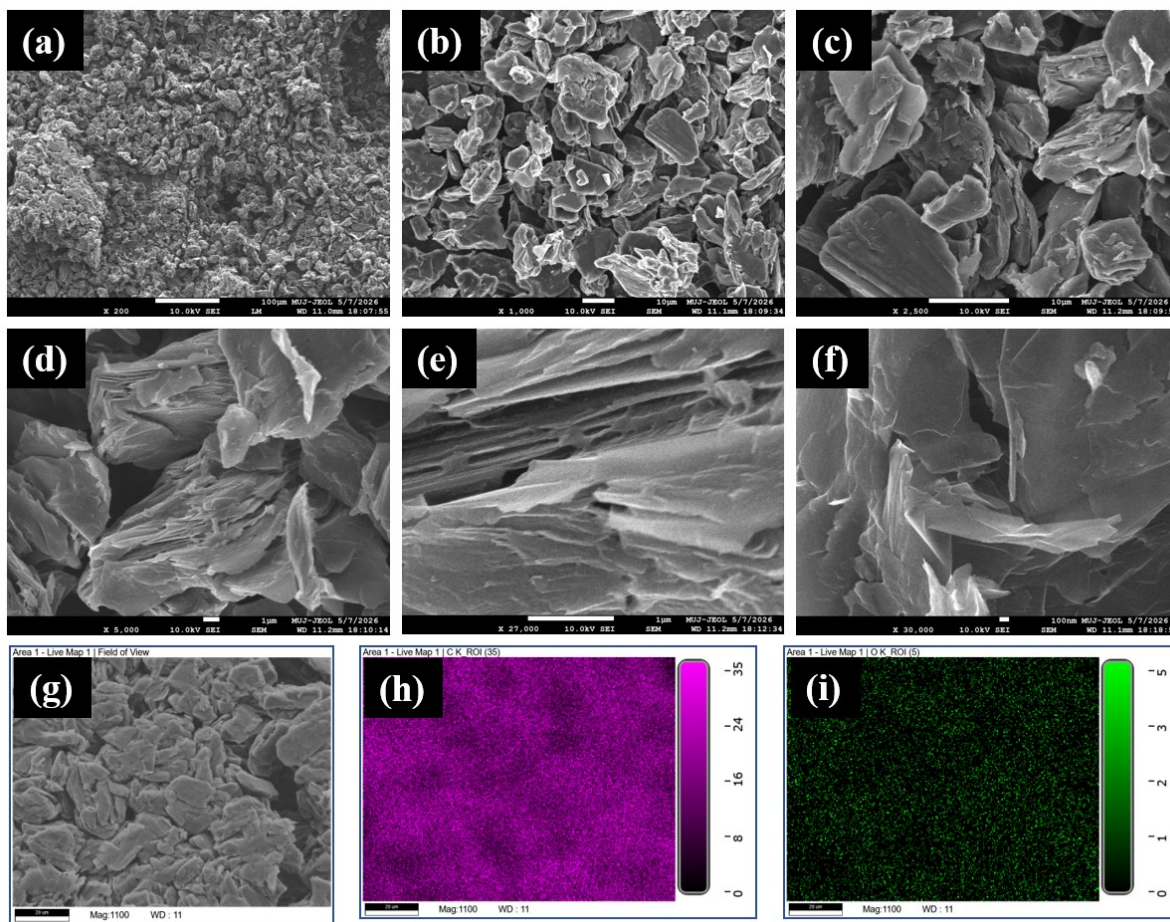

**Figure S10** SEM characterization of GR-C (a-g) SEM micrographs at different magnifications and (h,i) elemental mapping of C and O respectively

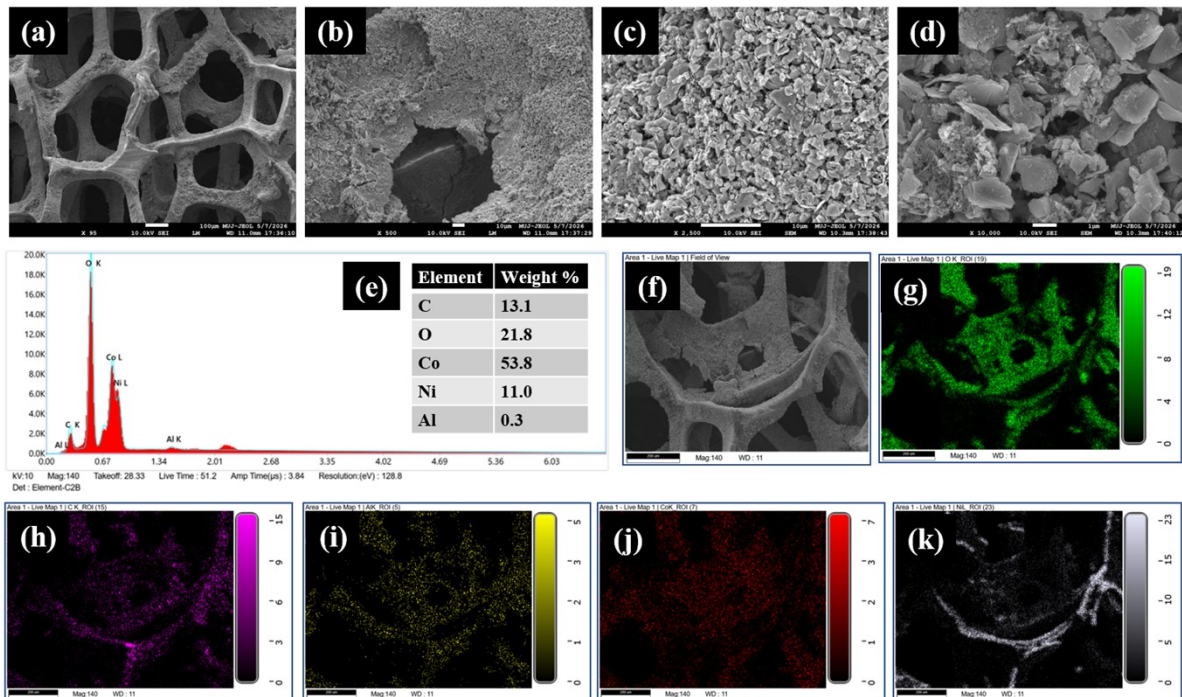

**Figure S11** SEM characterization of LCO-BM\_NF (a-d) SEM micrographs at different magnifications; (e) EDX spectrum; (f) SEM image selected for elemental mapping and (g-k) corresponding elemental mapping of O, C, Al, Co and Ni respectively

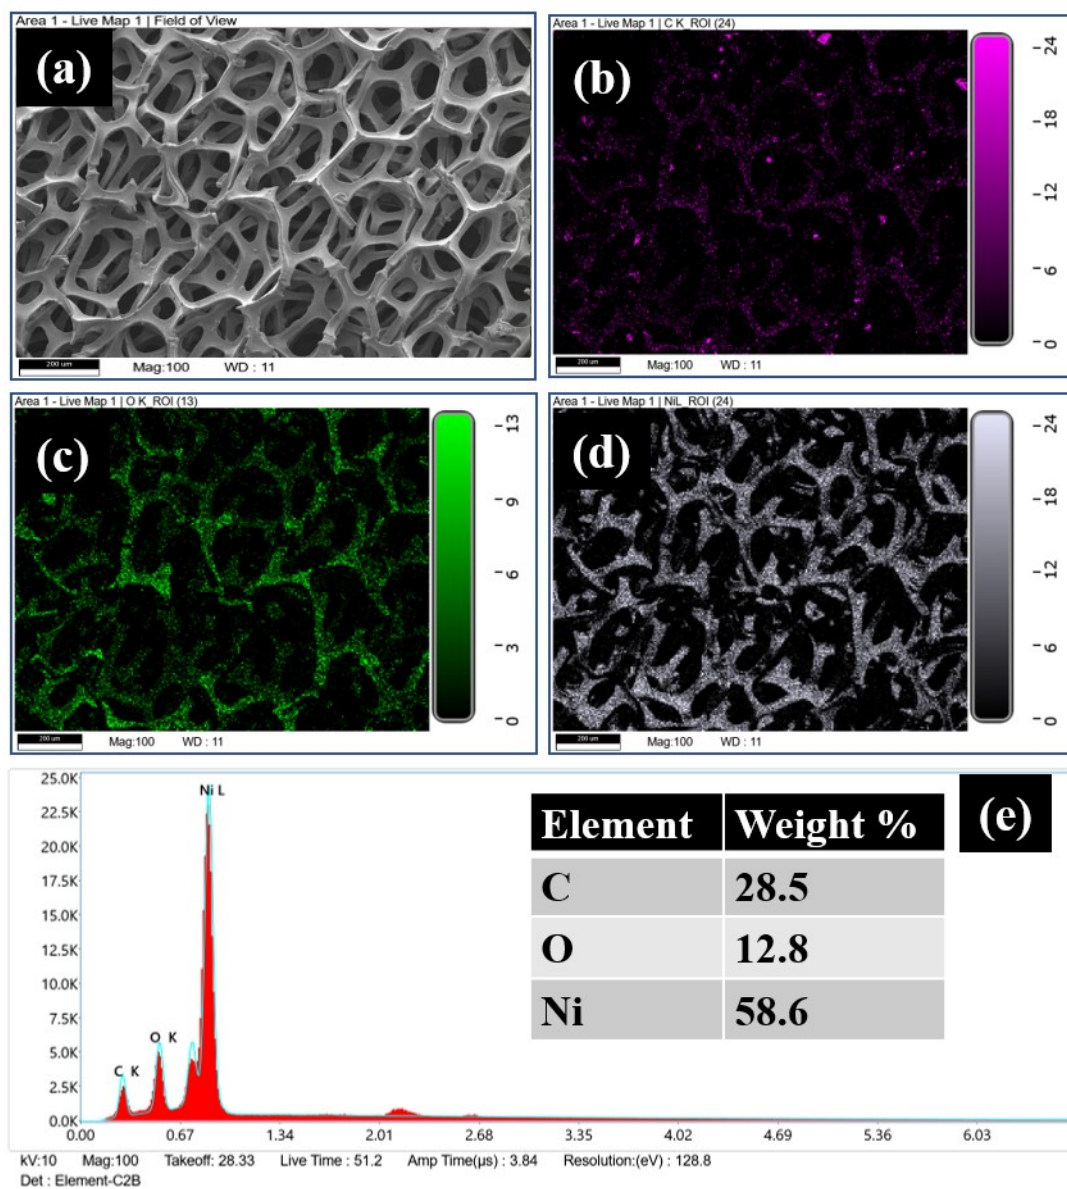

**Figure S12** SEM characterization of GR-C\_NF (a) SEM image selected for elemental mapping; (b-d) elemental mapping of C, O and Ni respectively and (g) EDX spectrum

**Table S1:** Literature survey of electrode materials recovered from spent LIBs for SC development

| Electrode                           | Material recovered | Recovery Method | Electrode Synthesis Methods | Specific Capacitance (F/g) | Cyclic stability (%) | Energy density (Wh/kg)    | Power density (W/kg)    | Ref. |
|-------------------------------------|--------------------|-----------------|-----------------------------|----------------------------|----------------------|---------------------------|-------------------------|------|
| Co <sub>3</sub> O <sub>4</sub> -450 | Cathode            | Leaching        | Calcination                 | 98 mF/cm <sup>2</sup>      | 100 (1000 cycles)    | 0.022 mWh/cm <sup>2</sup> | 0.84 mW/cm <sup>2</sup> | 16   |
| LIB cathode + 10 % CNT              | Cathode            | Calcination     | Doping                      | 165                        | 92 (1000 cycles)     | 33.4                      | 3239                    | 18   |
| Co <sub>3</sub> O <sub>4</sub>      | Cathode            | Leaching        | Electrodeposition           | 1273                       | 96 (5000 cycles)     | -                         | -                       | 17   |
| CNMOH                               | Cathode            | Leaching        | -                           | 1219 mF/cm <sup>2</sup>    | 100 (10,000 cycles)  | 8.78                      | 263.09                  | 19   |
| Li-Ni-Mn-                           | Cathode            | Leaching        | Electrodeposition           | 951                        | 90 (10,000 cycles)   | 30                        | 377                     | 20   |

|                 |            |          |                   |      |                  |       |        |    |
|-----------------|------------|----------|-------------------|------|------------------|-------|--------|----|
| Co hydroxides   |            |          |                   |      |                  |       |        |    |
| TRGNs-Mo        | Anode      | -        | Thermal reduction | 415  | 88 (5000 cycles) | 14.42 | 103.86 | 21 |
| S <sub>2</sub>  |            |          |                   |      |                  |       |        |    |
| GO+GQD          | Anode      | -        | Chemical method   | 2519 | 88 (1000 cycles) | 126   | -      | 22 |
| Graphite@M      | Black mass | Leaching | Chemical method   | 270  | 80 (5000 cycles) | 0.85  | 1900   | 23 |
| nO <sub>x</sub> |            |          |                   |      |                  |       |        |    |

**Table S2:** Electrochemical performance parameters of synthesized electrodes

| Electrode | Oxidation peak (V) | Current (mA) | CV-derived specific capacitance (F/g) | GCD-derived specific capacitance (F/g) |
|-----------|--------------------|--------------|---------------------------------------|----------------------------------------|
| LCO-S_NF  | 0.37               | 65.73        | 826.46                                | 557.59                                 |
| LCO-BS_NF | 0.48               | 55.20        | 1089.61                               | 1167                                   |
| LCO-C_NF  | 0.44               | 23.06        | 174.63                                | 152.94                                 |
| GR-C_NF   | 0.41               | 41.28        | 433.07                                | 281.56                                 |
| GR-S_NF   | 0.44               | 21.94        | 174.63                                | 146.25                                 |
| GR-BS_NF  | 0.46               | 7.31         | 73.61                                 | 82.11                                  |

**Table S3:** Comparison of LCO-BM\_NF asymmetric with GR-C\_NF with some reported Co-based two-electrode asymmetric systems

| Material                                                     | Specific capacitance (F/g) | Electrolyte used                   | Potential window (V) | Energy density (Wh/kg) | Power density (W/kg) | Cyclic stability (%) | Reference     |
|--------------------------------------------------------------|----------------------------|------------------------------------|----------------------|------------------------|----------------------|----------------------|---------------|
| Co(OH) <sub>2</sub>   PC                                     | 260 at 2 A/g               | 3 M KOH                            | 1.5                  | 76.7                   | 1416.9               | 91 (5000 cycles)     | <sup>57</sup> |
| Co <sub>2</sub> Mn <sub>3</sub> O <sub>8</sub>   HBFC        | -                          | 2 M KOH                            | 1.7                  | 24.3                   | 850                  | 91.7 (10,000 cycles) | <sup>58</sup> |
| NiCuCoO  AC                                                  | 105 at 1A/g                | 3 M KOH                            | 1.6                  | 96                     | 841                  | 95 (5000 cycles)     | <sup>59</sup> |
| Co <sub>3</sub> O <sub>4</sub> -CQD  AC                      | 51 at 0.5 A/g              | 1 M KOH                            | 1.4                  | 13.88                  | 684.65               | 96 (5000 cycles)     | <sup>60</sup> |
| Co(OH) <sub>2</sub> @PANI  AC                                | 385 at 1 A/g               | 6 M KOH                            | 1.4                  | 31.2                   | 1050                 | 74.8 (5000 cycles)   | <sup>61</sup> |
| MnS/Ni <sub>3</sub> S <sub>2</sub> @Co(OH) <sub>2</sub>   AC | 219.5 1 A/g                | 1 M KOH                            | 1.5                  | 68.6                   | 750                  | 91.2 (10,000 cycles) | <sup>62</sup> |
| Fe-CoWO <sub>4</sub>   AC                                    | 82.6 at 1 A/g              | 3 M KOH                            | 1.5                  | 25.8                   | 750                  | 77.3 (10,000 cycles) | <sup>63</sup> |
| CoPO  AC                                                     | -                          | 2 M H <sub>2</sub> SO <sub>4</sub> | 1.4                  | 24.02                  | 299.21               | 99 (5000 cycles)     | <sup>64</sup> |
| CoMn <sub>4</sub>   AC                                       | 81.8 at 0.25 A/g           | 6 M KOH+PVA                        | 1.6                  | 29.1                   | 320                  | 96.5 (10,000 cycles) | <sup>65</sup> |
| LCO-BM_NF  GR-C_NF                                           | 16.35 at 0.5 A/g           | 6 M KOH                            | 2                    | 90.87                  | 5,000                | 53 (10,000 cycles)   | Current work  |
